# Supplementary material for: Viromes of Tabanids from Russia
Source: MDPI journal article supplement (doi:10.3390/v15122368), 2023-11-30
Supplement: s1 [file s1]

Table S1. Oligonucleotides used for PCR-detection of the novel viruses.

| Pool | Virus                                 | Oligonucleotide name | Oligonucleotide sequence                | Product length | Temperature |
|------|---------------------------------------|----------------------|-----------------------------------------|----------------|-------------|
| 1    | Xanka Hybomitra Negev-like virus      | NegevL-p1_F          | GATGCGTTAAAAGAAGCGAA                    | 310            | 50          |
|      |                                       | Negev_p1_P           | (FAM)-ACCGACAAGCCAGTGATACCTGACA-(BHQ-1) |                |             |
|      |                                       | NegevL-p1_R          | TTGGACAAAACACGGAATTG                    |                |             |
|      | Razdolnyj Hybomitra Phasma-like virus | Orto_p1_F            | TGTTGTTGCTAATGTTCCAC                    | 308            | 50          |
|      |                                       | Orto_p1_R            | ATTCTGATGATTCTCTGGGTG                   |                |             |
| 2    | Kamenushka Hybomitra Narna-like virus | Narn_p2_F            | CGTTAATCATTGCGCTTGA                     | 399            | 50          |
|      |                                       | Narn_p2_P            | (FAM)-GCGCACTGAGGACAGTGGCC-(BHQ-1)      |                |             |
|      |                                       | Narn_p2_R            | CCATTTTGTAGGGTTGACAG                    |                |             |
|      | Volxa Hybomitra Toti-like virus       | Toti_p2_F            | AACTCGACGATGAATGTGAA                    | 358            | 50          |
|      |                                       | Toti_p2_P            | (FAM)-GCAGCTTGGTATCTGATGGCGCT-(BHQ-1)   |                |             |
|      |                                       | Toti_p2_R            | GAGAAGTGACTCGTAAGGAC                    |                |             |
|      | Komarovka Hybomitra Solemo-like virus | Sole_p2_F            | CGTGCATTCCCGCTATTTGT                    | 362            | 55          |
|      |                                       | Sole_p2_P            | (FAM)-GCTCCCACTGTGCCTTGAC-(BHQ-1)       |                |             |
|      |                                       | Sole_p2_R            | AGTGATGCCAGCCCATGTTT                    |                |             |
|      | Barsukovka Hybomitra Ifla-like virus  | Ifla_p2_F            | TTTGTATTGATCCAGGTGCT                    | 363            | 52          |
|      |                                       | Ifla_p2_P            | (FAM)-ACTTTGAGACCACCCCGCCA-(BHQ-1)      |                |             |
|      |                                       | Ifla_p2_R            | TTTCTGCTATGCCTAAAGGT                    |                |             |
| 3    | Big rock Hybomitra Ifla-like virus    | C30_p3_F             | TTCTTGCTGCACTAGTATTGA                   | 252            | 50          |
|      |                                       |                      | TGGGTCTGTGTTGGACAATAACACCCA             |                |             |

|   |                                                      |             |                                              |     |    |
|---|------------------------------------------------------|-------------|----------------------------------------------|-----|----|
|   |                                                      | C30_p3_R    | GAATTGACTGATGATGCTTCT                        |     |    |
| 6 | Medvezhye<br>Haematopota Flavi-<br>like virus        | LFla_p6_F   | CCGAAAGTCAAGAAGAATGC                         | 286 | 50 |
|   |                                                      | LFla_p6_R   | CTGGATGGTATATGCGTTGA                         |     |    |
|   | Melisia<br>Haematopota<br>Negev-like virus           | NegevL_p6_F | CGTATGTTTGTTCATTCGCAA                        | 261 | 50 |
|   |                                                      | NegevL_p6_P | (FAM)-<br>CCATAGGCAGGGCAGTCACA-<br>(BHQ-1)   |     |    |
|   |                                                      | NegevL_p6_R | CAGACCAAAAGGACTCATCA                         |     |    |
|   | Medvezhye<br>Haematopota<br>Xinmo-like virus         | Anphe_p6_F  | TTGTTATTATCCCAGGTGCC                         | 367 | 50 |
|   |                                                      | Anphe_p6_R  | CGTCCTCTTGGATCTGTTAG                         |     |    |
|   | Medvezhye pound<br>Haematopota<br>Permuto-like virus | Permu_p6_F  | CCCAACGCATATCCTCATTA                         | 283 | 50 |
|   |                                                      | Permu_p6_P  | (FAM)-TGCCACGGGATGTTTCAACC-<br>(BHQ-1)       |     |    |
|   |                                                      | Permu_p6_R  | GAGCGGACAAATATACCCAT                         |     |    |
|   | Polka Haematopota<br>Nora-like virus                 | C191_p6_F   | TTTTGGAGGATTTGTGAATGC                        | 254 | 50 |
|   |                                                      | C191_p6_P   | (FAM)-GATCCTCACAGCCCGGCGTG-<br>(BHQ-1)       |     |    |
|   |                                                      | C191_p6_R   | CCTGAATCTTTCTGGCCTTAT                        |     |    |
|   | Polka Haematopota<br>Xinmo-like virus                | C223_p6_F   | TACCAAGTAGGCAACATACC                         | 270 | 50 |
|   |                                                      | C223_p6_R   | TGTTTCAGACATGAACTGGT                         |     |    |
| 7 | Medvezhye<br>Chrysops Negev-<br>like virus           | NegevL_p7_F | CATTGACCACATCTTGCATC                         | 400 | 52 |
|   |                                                      | NegevL_p7_P | (FAM)-<br>GGCATGTGAAGTGTAATGGAATC<br>(BHQ-1) |     |    |
|   |                                                      | NegevL_p7_R | ACTAAGGAGGGTCTAGTGTC                         |     |    |
|   | Big Sioux River<br>virus (strain<br>Medveje)         | BSR_p7_F    | TTTAATATGCAACCACGGGA                         | 274 | 50 |
|   |                                                      | BSR_p7_P    | (FAM)-TGCGCACTCGTCCCGAATGA-<br>(BHQ-1)       |     |    |

|  |                                              |           |                                                |     |    |
|--|----------------------------------------------|-----------|------------------------------------------------|-----|----|
|  |                                              | BSR_p7_R  | TGGTAGAACAGGATTGTGTG                           |     |    |
|  | Medvezhye<br>Chrysops Solemo-<br>like virus  | Sol1_p7_F | TCTTTCTTCAAGATCGGCAA                           | 326 | 50 |
|  |                                              | Sol1_p7_P | (FAM)-<br>TCTGGGCGGCAGCAACTATG-<br>(BHQ-1)     |     |    |
|  |                                              | Sol1_p7_R | GGAGAGTCAGCATTGGTTTA                           |     |    |
|  | Melisia Chrysops<br>Solemo-like virus        | Sol2_p7_F | ATGATCAAACCGTGTTGAGA                           | 358 | 50 |
|  |                                              | Sol2_p7_P | (FAM)-<br>AACCATTGCGCACAAGATCTGTAA-<br>(BHQ-1) |     |    |
|  |                                              | Sol2_p7_R | CAGTGATCAGAGCCTTAGAC                           |     |    |
|  | Polka Chrysops<br>Solemo-like virus          | Sol3_p7_F | AAAGTAAAACCAGGCGTTTG                           | 268 | 50 |
|  |                                              | Sol3_p7_P | (FAM)-<br>AACTCGAACGATTGATGCGGT-(BHQ-<br>1)    |     |    |
|  |                                              | Sol3_p7_R | AACTCGATGTATTCTGGCTC                           |     |    |
|  | Medvezhye<br>Chrysops Narna-like<br>virus    | Nar1_p7_F | TTTTCTTCGACATATGGGCA                           | 255 | 50 |
|  |                                              | Nar1_p7_R | GCTTTGATATCAGATGCTGC                           |     |    |
|  | Medvezhye<br>Chrysops Narna-like<br>virus 2  | Nar2_p7_F | ACAGTGCGAAGTTGTTATCT                           | 327 | 50 |
|  |                                              | Nar2_p7_P | (FAM)-<br>CAAATGGCTCGGCTTGGTAGATCG-<br>(BHQ-1) |     |    |
|  |                                              | Nar2_p7_R | AGATCGGATAGCTTCGTCTA                           |     |    |
|  | Medvezhye<br>Chrysops Solinvi-<br>like virus | Soli_p7_F | ACATTGCCTTTTCCATTGTG                           | 335 | 50 |
|  |                                              | Soli_p7_R | AAAAGTTAGGCGTGACAGAT                           |     |    |
|  | Medvezhye<br>Chrysops Rhabdo-<br>like virus  | Rha_p7_F  | AGAGGCTCTCACTGACAATA                           | 292 | 50 |
|  |                                              | Rha_p7_P  | (FAM)-<br>TGGCTGACGGATCTGAGATCCCT-<br>(BHQ-1)  |     |    |
|  |                                              | Rha_p7_R  | CCCTCCTAAATGTCCTTTCC                           |     |    |

|   |                                      |           |                                                   |     |    |
|---|--------------------------------------|-----------|---------------------------------------------------|-----|----|
| 8 | Medvezhye Chrysops Ifla-like virus   | Ifla_p8_F | CATAAGAAGCATAACGACGC                              | 350 | 50 |
|   |                                      | Ifla_p8_P | (FAM)-<br>ACGATCTCCCGATTTCATCCATTCTG<br>A-(BHQ-1) |     |    |
|   |                                      | Ifla_p8_R | TGTGATGTGTCCTTACTTCG                              |     |    |
|   | Medvezhye Chrysops Toti-like virus   | Toti_p8_F | TGGTAACATCCAGTTCACAG                              | 387 | 50 |
|   |                                      | Toti_p8_P | (FAM)-TGCCGCTATGGGGGAGGCAT-<br>(BHQ-1)            |     |    |
|   |                                      | Toti_p8_R | TTTTCCGCCGTTATAGGTAG                              |     |    |
|   | Istie Chrysops Solemo-like virus     | Sole_p8_F | ATTCCAATTCCGAGTCAACA                              | 268 | 50 |
|   |                                      | Sole_p8_P | (FAM)-<br>AGTTGGGTAATTTCCGGGTCTTGGA-<br>(BHQ-1)   |     |    |
|   |                                      | Sole_p8_R | CGACCCTCCAAAAGTAAAGA                              |     |    |
|   | Medvezhye Chrysops Xinmo-like virus  | Rha_p8_F  | GTTCAAGCTTAGGGGTACA                               | 255 | 50 |
|   |                                      | Rha_p8_P  | (FAM)-<br>TCACGCACATGGTACAGATGCAA-<br>(BHQ-1)     |     |    |
|   |                                      | Rha_p8_R  | TATGTGATGCCAGTACGTTT                              |     |    |
|   | Medvezhye Chrysops Phasma-like virus | Orto_p8_F | GCATGCACTCATAGATGTTG                              | 260 | 50 |
|   |                                      | Orto_p8_R | GTGACTGGATTATCAACGGA                              |     |    |
| 9 | Medvezhye Tabanus Phasma-like virus  | Orto_p9_F | ACTACAAGTTTAGGTGCCAG                              | 370 | 50 |
|   |                                      | Orto_p9_R | ATGATGTGTAACTGCTGGT                               |     |    |
|   | Medvezhye Tabanus Chu-like virus     | Rha_p9_F  | TCACTTAAAGTTGCGGATGA                              | 334 | 50 |
|   |                                      | Rha_p9_R  | TTACAACCTTATGGACACGCA                             |     |    |
|   | Medvezhye Tabanus Toti-like virus    | Toti_p9_F | AGTCTTAGCCTATACAGCCA                              | 353 | 50 |
|   |                                      | Toti_p9_P | (FAM)-<br>TCCTCCATGCCCGGCTTGAGT-(BHQ-<br>1)       |     |    |
|   |                                      | Toti_p9_R | TGATTAGGCCACATGTGAAA                              |     |    |

Table S2. Oligonucleotides used for internal control Poliovirus RT-qPCR.

| Oligonucleotide | Sequence                                 |
|-----------------|------------------------------------------|
| PVR1            | 5'-CGAACGTGATCCTGAGTGTT-3'               |
| PVP1            | (ROX)-TTGATTCATGAATTCCTTCATTGGCA-(BHQ-2) |
| PVL1            | 5'-GGCAGACGAGAAATACCCAT-3'               |

Table S3. Characteristics of viruses with complete and partial coding sequences.

| Pool | Virus                                          | Presence in the pool (%) | Comparison protein | Closest relative                                         | Q cover | Identity |
|------|------------------------------------------------|--------------------------|--------------------|----------------------------------------------------------|---------|----------|
| 1    | Xanka Hybomitra Negev-like virus               | 0.01                     | ORF1 (RdRp)        | [URQ09136.1] Halyomorpha halys negev-like virus 1        | 61%     | 42.2%    |
| 2    | Kamenushka Hybomitra Narna-like virus          | <0.01%                   | RdRp               | [QVG74774.1] Riboviria sp.                               | 89%     | 52.5%    |
|      | Volxa Hybomitra Toti-like virus                | 0.01                     | RdRp               | [UPT53761.1] Bactrocera zonata toti-like virus           | 99%     | 41.1%    |
|      | Komarovka Hybomitra Solemo-like virus          | <0.01%                   | RdRp               | [UJG28005.1] Ulaatai Melophagus solemo-like virus        | 75%     | 63.6%    |
|      |                                                |                          | CP                 | [APG75767.1] Hubei sobemo-like virus 48                  | 93%     | 52.7%    |
| 6    | Medvezhye Haematopota Flavi-like virus         | 0.29                     | Polyprotein        | [QTJ63573.1] Orthopteran flavi-related virus             | 15%     | 41.7%    |
|      | Melisia Haematopota Negev-like virus           | 0.23                     | ORF1 (RdRp)        | [URQ09136.1] Halyomorpha halys negev-like virus 1        | 61%     | 39.2%    |
|      | Medvezhye Haematopota Xinmo-like virus         | 0.18                     | RpRp               | [YP_009337182.1] Hubei diptera virus 11                  | 98%     | 35.9%    |
|      | Medvezhye pound Haematopota Permuto-like virus | 0.03                     | Polyprotein        | [WKV34304.1] Riboviria sp.                               | 61%     | 35.8%    |
| 7    | Medvezhye Chrysops Negev-like virus            | 1.08                     | ORF1 (RdRp)        | [UPT53679.1] Zeugodacus tau negev-like virus             | 73%     | 44.3%    |
|      | Big Sioux River virus (strain Medvezhye)       | 0.48                     | ORF1               | [ATI98938.1] Big Sioux River virus                       | 99%     | 99.9%    |
|      | Medvezhye Chrysops Solemo-like virus           | 0.13                     | RdRp               | [YP_009330098.1] Hubei sobemo-like virus 13              | 73%     | 51.1%    |
|      |                                                |                          | CP                 | [YP_009342449.1] Wuhan house centipede virus 5           | 99%     | 37.7%    |
|      | Melisia Chrysops Solemo-like virus             | 0.28                     | RdRp               | [UCS96389.1] Riboviria sp.                               | 81%     | 55.7%    |
|      |                                                |                          | CP                 | [APG75767.1] Hubei sobemo-like virus 48                  | 86%     | 52.6%    |
|      | Polka Chrysops Solemo-like virus               | 0.05                     | RdRp               | [QIJ70118.1] Jeffords solemo-like virus                  | 95%     | 39.5%    |
|      |                                                |                          | CP                 | [QHA33885.1] Atrato Sobemo-like virus 3                  | 86%     | 35.4%    |
|      | Medvezhye Chrysops Narna-like virus            | 0.61                     | RdRp               | [UHR49680.1] Sanya cydistomyia duplonotatay narnavirus 1 | 91%     | 51.2%    |
| 8    | Medvezhye Chrysops Narna-like virus 2          | 0.23                     | RdRp               | [UHR49680.1] Sanya cydistomyia duplonotatay narnavirus 1 | 92%     | 51.4%    |
|      | Medvezhye Chrysops Ifla-like virus             | 0.02                     | Polyprotein        | [UQJ82152.1] Exitianus exitiosus virus 2                 | 95%     | 34.5%    |
|      | Medvezhye Chrysops                             | 0.03                     | RdRp               | [YP_009333170.1] Hubei toti-                             | 98%     | 60%      |

|  |                                        |      |      |                                             |     |       |
|--|----------------------------------------|------|------|---------------------------------------------|-----|-------|
|  | Toti-like virus                        |      |      | like virus 19                               |     |       |
|  | Istie Chrysops<br>Solemo-like virus    | 0.01 | RdRp | [QXV86400.1] Solemoviridae<br>sp.           | 68% | 46.6% |
|  |                                        |      | CP   | [APG75767.1] Hubei sobemo-<br>like virus 48 | 98% | 42.2% |
|  | Medvezhye Chrysops<br>Xinmo-like virus | 0.01 | L    | [YP_009337182.1]Hubei diptera<br>virus 11   | 98% | 39.2% |

Table S4. Characteristics of genome fragments detected in the study.

| Pool | Contig type and assigned name                                              | Contig name           | Closest relative                                            | Protein      | Q cover | Identity |
|------|----------------------------------------------------------------------------|-----------------------|-------------------------------------------------------------|--------------|---------|----------|
| 1    | <b>Orthophasma-like</b><br><br>Razdolnyj<br>Hybomitra<br>Phasma-like virus | NODE_8_length_1310_   | [QXV86665.1] Tibet bird virus 1                             | nucleocapsid | 89%     | 42.8%    |
|      |                                                                            | NODE_19_length_530_   | [QID77675.1] Pink bollworm virus 2                          | RdRp         | 100%    | 69.3%    |
|      |                                                                            | NODE_21_length_478_   | [YP_009666959.1] Seattle Prectang virus                     | RdRp         | 100%    | 46%      |
|      |                                                                            | NODE_22_length_468_   | [UHK03218] Hangzhou zicrona caerulea phasmavirus 1          | RdRp         | 99%     | 53.3%    |
| 2    | <b>Iflaviridae-like</b><br><br>Barsukovka<br>Hybomitra Ifla-like virus     | NODE_11_length_1234_  | [WEU50803.1] Chrysopa pallens                               | Polyprotein  | 93%     | 35.7%    |
|      |                                                                            | NODE_20_length_639_   | [CAF1136435.1] Ceratitis capitata iflavirus 3               | Polyprotein  | 96%     | 48.4%    |
|      |                                                                            | NODE_21_length_616_   | [UJG27957.1] Khandagaity Melophagus ifla-like virus         | Polyprotein  | 100%    | 36.9%    |
|      |                                                                            | NODE_24_length_577_   | [WEU50803.1] Chrysopa pallens                               | Polyprotein  | 100%    | 31.8%    |
|      |                                                                            | NODE_27_length_467_   | [QZZ63343.1] Leuven wasp-associated virus 3                 | Polyprotein  | 99%     | 46.1%    |
|      |                                                                            | NODE_28_length_466_   | [UUG74229.1]XiangYun picorna-like virus 4                   | Polyprotein  | 79%     | 57.6%    |
|      |                                                                            | NODE_37_length_408_   | [UQJ82152.1] Exitianus exitiosus virus 2                    | Polyprotein  | 100%    | 63%      |
| 3    | <b>Iflaviridae-like</b><br><br>Big rock<br>Hybomitra Ifla-like virus       | NODE_30_length_381_   | [CAF1136435] Ceratitis capitata iflavirus 3                 | Polyprotein  | 98%     | 39.6%    |
| 6    | <b>Nora virus-like</b><br><br>Polka<br>Haematopota<br>Nora-like virus      | NODE_191_length_616_  | [ASM93992]Caledonia beadlet anemone Nora virus-like virus 1 | ORF2         | 96%     | 42.9%    |
|      | <b>Xinoviridae-like</b><br><br>Polka<br>Haematopota<br>Xinmo-like virus    | NODE_223_length_580_  | Hubei diptera virus 11                                      | RdRp         | 97%     | 53.6%    |
| 7    | <b>Solinviviridae-like</b>                                                 | NODE_115_length_1354_ | [UHK03205.1] Hangzhou Solinvi-like virus 2                  | Polyprotein  | 99%     | 38%      |
|      |                                                                            | NODE_146_length_1248_ | [UHK03205.1] Hangzhou                                       | Polyprotein  | 99%     | 72%      |

|   |                                                                              |                       |                                                                |              |      |       |
|---|------------------------------------------------------------------------------|-----------------------|----------------------------------------------------------------|--------------|------|-------|
|   | Medvezhye<br>Chrysops<br>Solinvi-like<br>virus                               |                       | Solinvi-like virus 2                                           |              |      |       |
|   |                                                                              | NODE_267_length_903_  | [UHK03205.1] Hangzhou<br>Solinvi-like virus 2                  | Polyprotein  | 99%  | 68.6% |
|   |                                                                              | NODE_312_length_849_  | [UHK03205.1] Hangzhou<br>Solinvi-like virus 2                  | Polyprotein  | 100% | 75.5% |
|   |                                                                              | NODE_382_length_787_  | [UHK03205.1] Hangzhou<br>Solinvi-like virus 2                  | Polyprotein  | 99%  | 74.2% |
|   |                                                                              | NODE_574_length_664_  | [UHK03205.1] Hangzhou<br>Solinvi-like virus 2                  | Polyprotein  | 100% | 75.1% |
|   |                                                                              | NODE_617_length_640_  | [UHK03205.1] Hangzhou<br>Solinvi-like virus 2                  | Polyprotein  | 100% | 46.5% |
| 7 | <b>Rhabdo-like</b><br><br>Medvezhye<br>Chrysops<br>Rhabdo-like<br>virus      | NODE_9_length_4303_   | [AJG39162.1] Wuhan Fly<br>Virus 3                              | L            | 99%  | 36.8% |
| 7 | <b>Rhabdo-like</b><br><br>Melisia<br>Chrysops<br>Rhabdo-like<br>virus        | NODE_120_length_1338_ | [YP_009336837.1] Hubei<br>lepidoptera virus 2                  | L            | 95%  | 46.6% |
|   |                                                                              | NODE_12_NODE_108_     | [UZC34538.1] jopcygcgri<br>virus 1                             | L            | 99%  | 50%   |
| 8 | <b>Orthophasma-like</b><br><br>Medvezhye<br>Chrysops<br>Phasma-like<br>virus | NODE_16_length_3720   | [QXV86663.1]Tibet bird<br>virus 1                              | RdRp         | 99%  | 52%   |
|   |                                                                              | NODE_43_length_2382_  | [YP_010086190.1]<br>Anopheles triannulatus<br>orthophasmavirus | Glycoprotein | 90%  | 29.4% |
|   |                                                                              | NODE_163_length_1495_ | [QXV86665.1]Tibet bird<br>virus 1                              | N            | 69%  | 39.1% |
|   |                                                                              | NODE_299_length_1184_ | [QXV86663.1]Tibet bird<br>virus 1                              | RdRp         | 99%  | 31.5% |
| 8 | Solinviridae-like                                                            | NODE_2118_length_528_ | [UHK03205.1]Hangzhou<br>Solinvi-like virus 2                   | Polyprotein  | 67%  | 82.4% |
|   |                                                                              | NODE_3267_length_436_ | [UHK03205.1]Hangzhou<br>Solinvi-like virus 2                   | Polyprotein  | 99%  | 70.8% |
|   |                                                                              | NODE_4305_length_385_ | [UHK03205.1]Hangzhou<br>Solinvi-like virus 2                   | Polyprotein  | 99%  | 50.8% |
| 9 | <b>Orthophasma-like</b><br><br>Medvezhye<br>Tabanus<br>Phasma-like<br>virus  | NODE_10_length_1088_  | [QXV86665.1] Tibet bird<br>virus 1                             | N            | 97%  | 38.9% |
|   |                                                                              | NODE_47_length_434_   | [YP_009666982] Ganda<br>bee virus                              | Glycoprotein | 98%  | 37.9% |
| 9 | <b>Toti-like</b><br><br>Medvezhye<br>Tabanus Toti-like<br>virus              | NODE_20_length_755_   | [YP_009333170.1]Hubei<br>toti-like virus 19                    | VP2          | 99%  | 67%   |
|   |                                                                              | NODE_24_length_700_   | [YP_009333170.1]Hubei<br>toti-like virus 19                    | VP2          | 96%  | 79.2% |
|   |                                                                              | NODE_64_length_393_   | [YP_009333170.1]Hubei<br>toti-like virus 19                    | VP2          | 100% | 67.7% |
|   |                                                                              | NODE_69_length_384_   | [YP_009333169.1]Hubei<br>toti-like virus 19                    | VP1          | 100% | 72.4% |
| 9 | <b>Chu-like</b><br><br>Medvezhye<br>Tabanus Chu-<br>like virus               | NODE_19_length_798_   | [YP_010798609.1]<br>megalopteran chu-related<br>virus 119      | Glycoprotein | 39%  | 52.8% |
|   |                                                                              | NODE_22_length_739_   | [YP_010798611.1]<br>megalopteran chu-related<br>virus 119      | RdRp         | 97%  | 34.8% |

|  |  |                     |                                                     |      |      |       |
|--|--|---------------------|-----------------------------------------------------|------|------|-------|
|  |  | NODE_25_length_693_ | [APG78769.1] Hubei chuvirus-like virus 4            | RdRp | 99%  | 48.3% |
|  |  | NODE_35_length_520_ | [YP_010798611.1] megalopteran chu-related virus 119 | RdRp | 100% | 32.4% |
|  |  | NODE_36_length_509_ | [YP_010798611.1] megalopteran chu-related virus 119 | RdRp | 98%  | 54.5% |

Table S5. Similarity estimation within tabanid negev-like viruses using discontinuous megablast on the full genome.

|                                      |                                  |                                     |
|--------------------------------------|----------------------------------|-------------------------------------|
|                                      | Xanka Hybomitra Negev-like virus | Medvezhye Chrysops Negev-like virus |
| Xanka Hybomitra Negev-like virus     | -                                | 68.9% (51% Q cover)                 |
| Melisia Haematopota Negev-like virus | 70.1% (57% Q cover)              | 71.2% (68% Q cover)                 |

Table S6. Similarity estimation within tabanid xinmo-like sequences using L protein amino acid sequence.

|                                        |                                        |                      |
|----------------------------------------|----------------------------------------|----------------------|
|                                        | Medvezhye Haematopota Xinmo-like virus | NODE_223_length_580_ |
| Medvezhye Haematopota Xinmo-like virus | -                                      | 57.2% (97% cover)    |
| Medvezhye Chrysops Xinmo-like virus    | 60.1% (98% cover)                      | 52.9% (98% cover)    |

Table S7. Similarity estimation within tabanid ifla-like sequences using polyprotein amino acid sequence.

| Pool | Contig Name          | Query cover to the GenBank Entry | Identity to the GenBank Entry | Query cover to Medvezhye Chrysops Ifla-like virus | Identity to the Medvezhye Chrysops Ifla-like virus |
|------|----------------------|----------------------------------|-------------------------------|---------------------------------------------------|----------------------------------------------------|
| 2    | NODE_11_length_1234_ | 93%                              | 35.7%                         | 93%                                               | 50.0%                                              |
|      | NODE_20_length_639_  | 96%                              | 48.4%                         | 99%                                               | 59.3%                                              |
|      | NODE_21_length_616_  | 100%                             | 36.9%                         | 99%                                               | 43.4%                                              |
|      | NODE_24_length_577_  | 100%                             | 31.8%                         | 100%                                              | 35.0%                                              |
|      | NODE_27_length_467_  | 99%                              | 46.1%                         | 99%                                               | 54.5%                                              |
|      | NODE_28_length_466_  | 79%                              | 57.6%                         | 79%                                               | 59.6%                                              |
|      | NODE_37_length_408_  | 100%                             | 63%                           | 100%                                              | 72.5%                                              |
| 3    | NODE_30_length_381_  | 98%                              | 39.6%                         | 98%                                               | 79.9%                                              |



Table S8. Similarity estimation within tabanid solinvi-like sequences using polyprotein amino acid sequence.

| Pool 8 contig name    | Pool 8 abundance | Pool 7 relative       | Q cover | Identity |
|-----------------------|------------------|-----------------------|---------|----------|
| NODE_2118_length_528_ | 10 reads         | NODE_146_length_1248_ | 35%     | 99.5%    |
| NODE_3267_length_436_ | 3 reads          | NODE_312_length_849_  | 93%     | 99.0%    |
| NODE_4305_length_385_ | 5 reads          | NODE_146_length_1248_ | 99%     | 96.9%    |

Table S9. Similarity estimation of pool 1 orthophasma-like contig with orthophasma-like sequences from pools 8 and 9 using amino acid sequences.

| Pool 1 contig name  | Pool 8 relative       | Q cover | Identity | Pool 9 relative      | Q cover | Identity |
|---------------------|-----------------------|---------|----------|----------------------|---------|----------|
| NODE_8_length_1310_ | NODE_163_length_1495_ | 85%     | 46.3%    | NODE_10_length_1088_ | 89%     | 62.6%    |
| NODE_19_length_530_ | NODE_16_length_3720_  | 100%    | 77.3%    | no                   | -       | -        |
| NODE_21_length_478_ | NODE_16_length_3720_  | 100%    | 56.2%    | no                   | -       | -        |
| NODE_22_length_468_ | NODE_16_length_3720_  | 99%     | 58.4%    | no                   | -       | -        |

Table S10. Similarity estimation of pool 9 orthophasma-like contig with orthophasma-like sequences from pools 8 and 1 using amino acid sequences.

| Pool 9 contig name   | Pool 8 relative       | Q cover | Identity | Pool 1 relative     | Q cover | Identity |
|----------------------|-----------------------|---------|----------|---------------------|---------|----------|
| NODE_10_length_1088_ | NODE_163_length_1495_ | 86      | 45.9%    | NODE_8_length_1310_ | 93%     | 62.6%    |
| NODE_47_length_434_  | NODE_43_length_2382_  | 98      | 42.0%    | no                  | -       | -        |

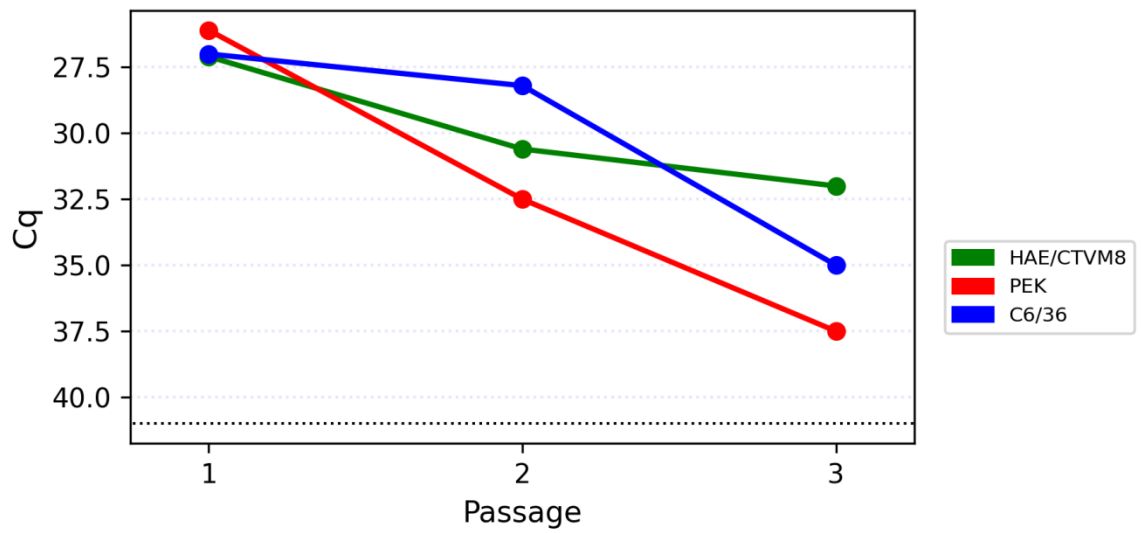

Figure S1. Dynamic of the real-time quantification cycle (Cq) during passages of the Xanka Hybomitra negev-like virus. Black dotted line represents qPCR detection limit (41 cycles).

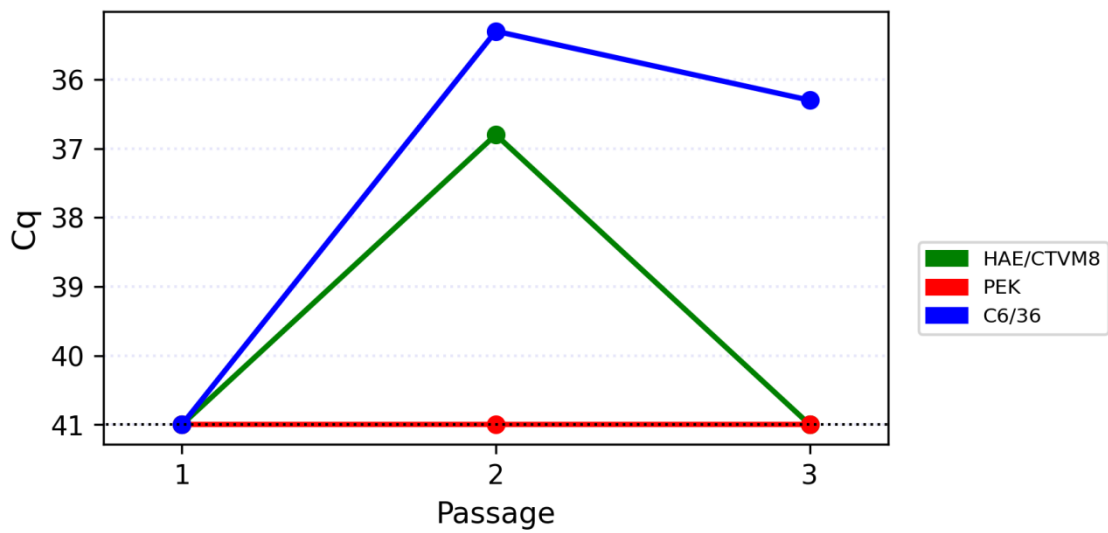

Figure S2. Dynamic of the real-time quantification cycle (Cq) during passages of the Volxa Hybomitra toti-like virus. Black dotted line represents qPCR detection limit (41 cycles).

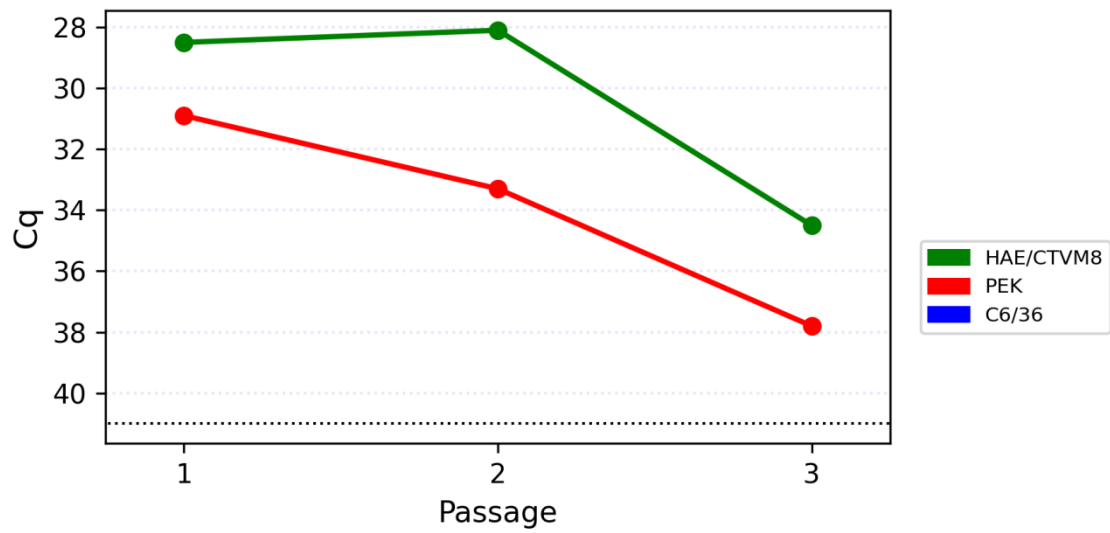

Figure S3. Dynamic of the real-time quantification cycle (Cq) during passages of the Kamenushka Hybomitra narna-like virus. Black dotted line represents qPCR detection limit (41 cycles).

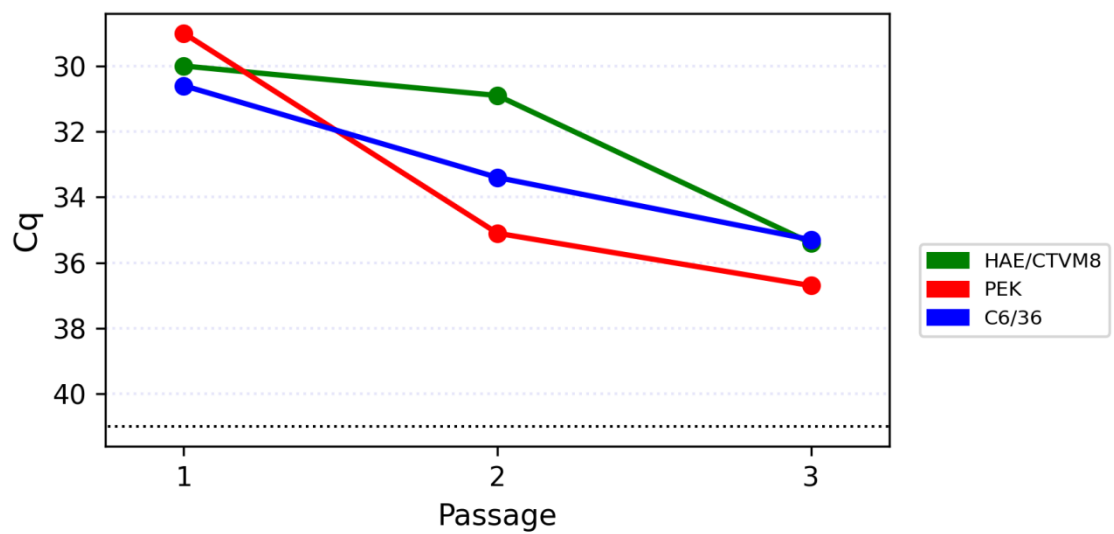

Figure S4. Dynamic of the real-time quantification cycle (Cq) during passages of the Medvezhye pound Haematopota permuto-like virus. Black dotted line represents qPCR detection limit (41 cycles).

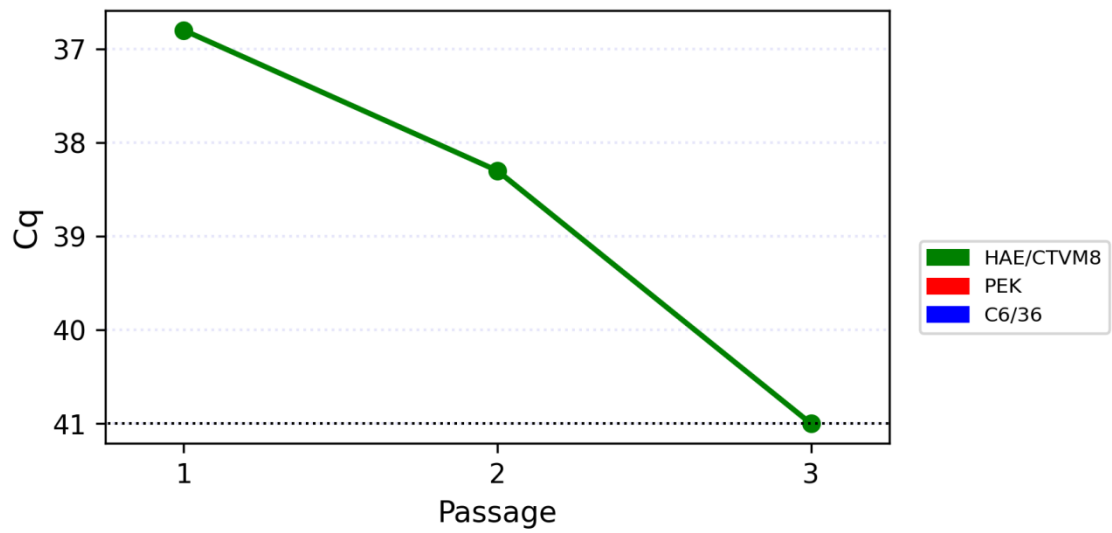

Figure S5. Dynamic of the real-time quantification cycle (Cq) during passages of the Polka Haematopota nora-like virus. Black dotted line represents qPCR detection limit (41 cycles).

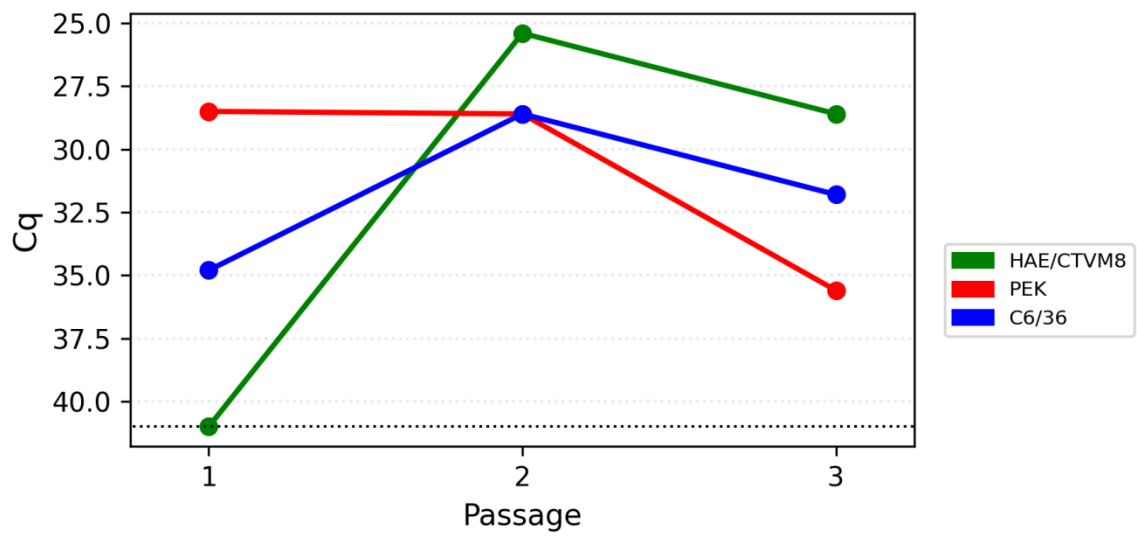

Figure S6. Dynamic of the real-time quantification cycle (Cq) during passages of the Big Sioux River virus (strain Medvezhye). Black dotted line represents qPCR detection limit (41 cycles).

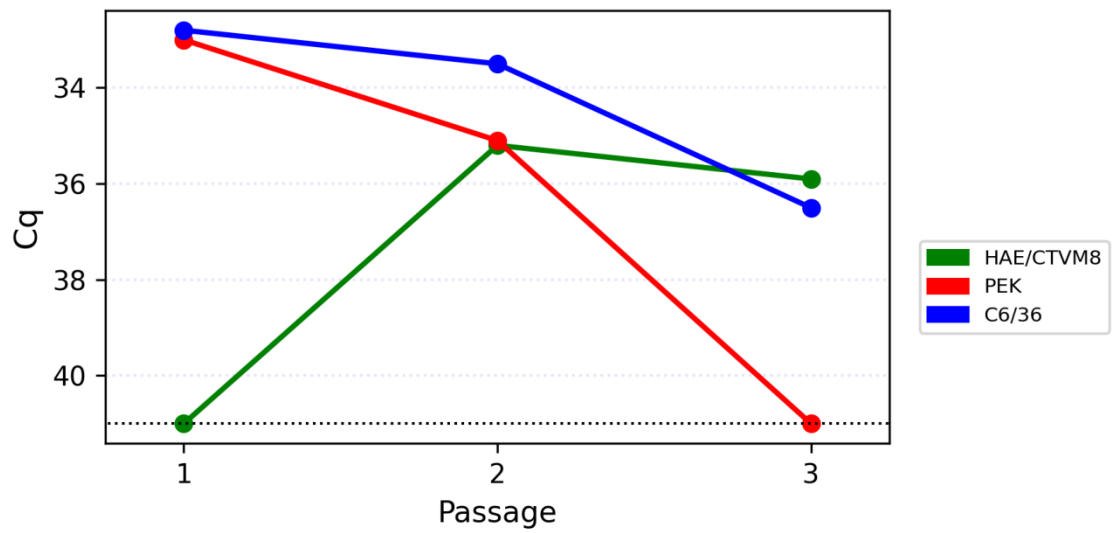

Figure S7. Dynamic of the real-time quantification cycle (Cq) during passages of the Melisia Chrysops solemo-like virus. Black dotted line represents qPCR detection limit (41 cycles).

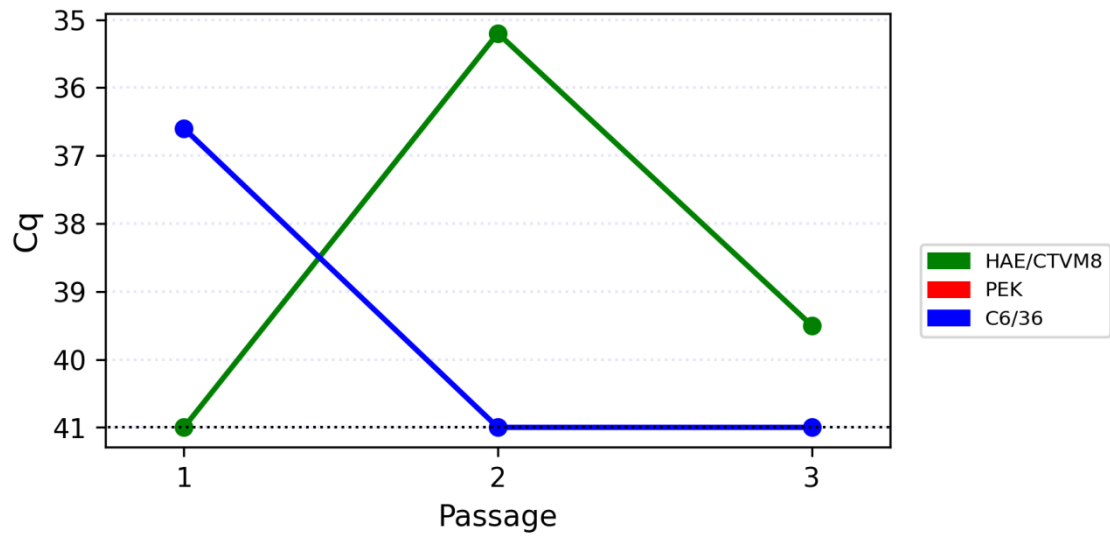

Figure S8. Dynamic of the real-time quantification cycle (Cq) during passages of the Polka Chrysops solemo-like virus. Black dotted line represents qPCR detection limit (41 cycles).

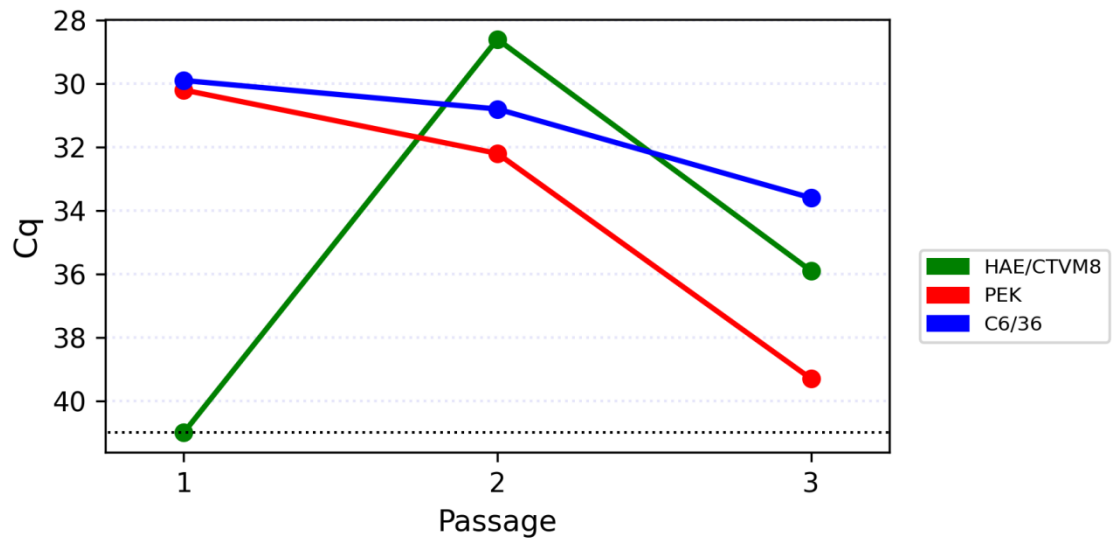

Figure S9. Dynamic of the real-time quantification cycle (Cq) during passages of the Medvezhye Chrysops narna-like virus 2. Black dotted line represents qPCR detection limit (41 cycles).

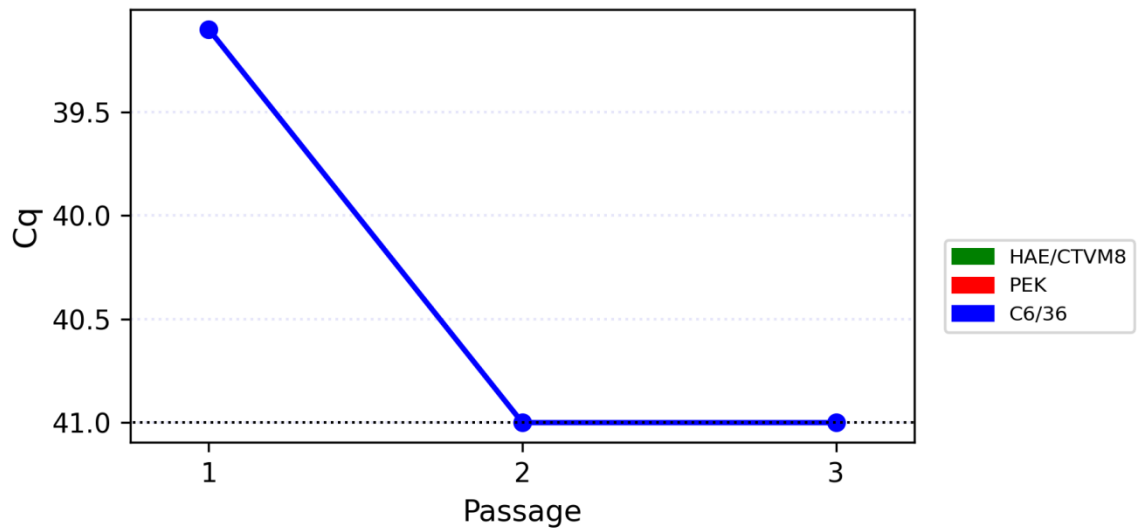

Figure S10. Dynamic of the real-time quantification cycle (Cq) during passages of the Medvezhye Chrysops rhabdo-like virus. Black dotted line represents qPCR detection limit (41 cycles).

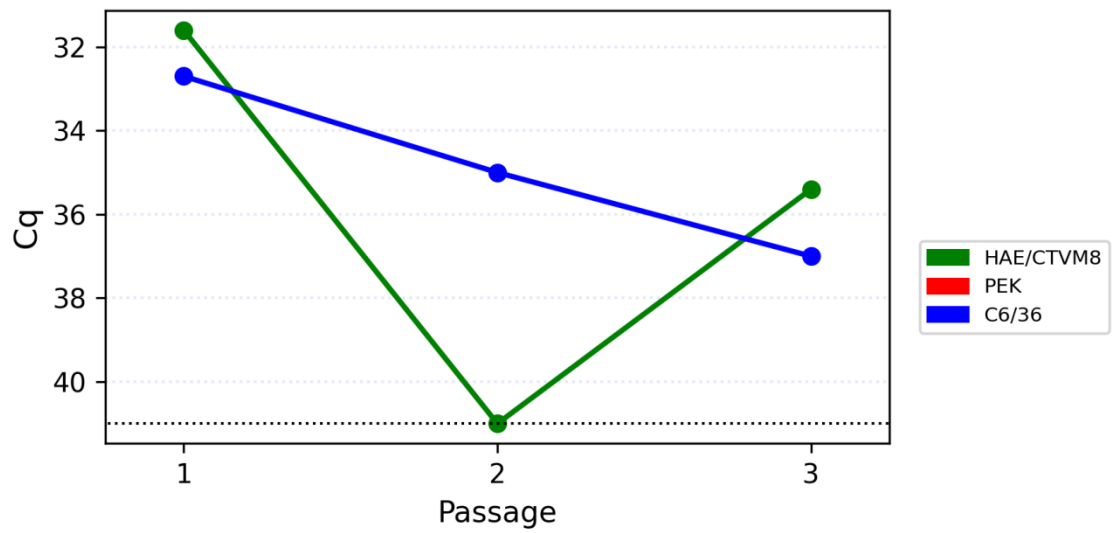

Figure S11. Dynamic of the real-time quantification cycle (Cq) during passages of the Istie Chrysops solemo-like virus. Black dotted line represents qPCR detection limit (41 cycles).

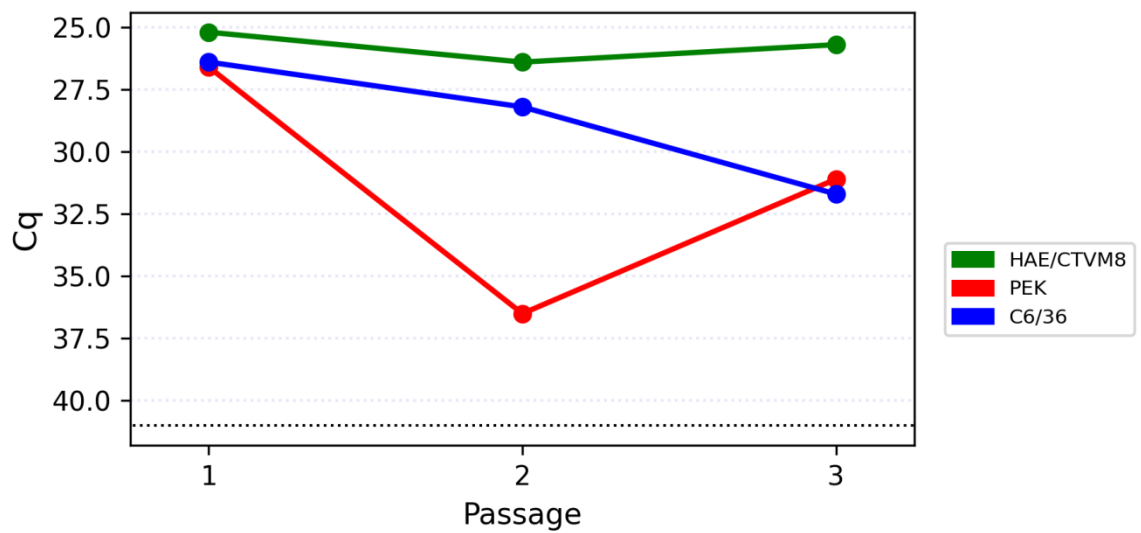

Figure S12. Dynamic of the real-time quantification cycle (Cq) during passages of the Medvezhye Tabanus toti-like virus. Black dotted line represents qPCR detection limit (41 cycles).

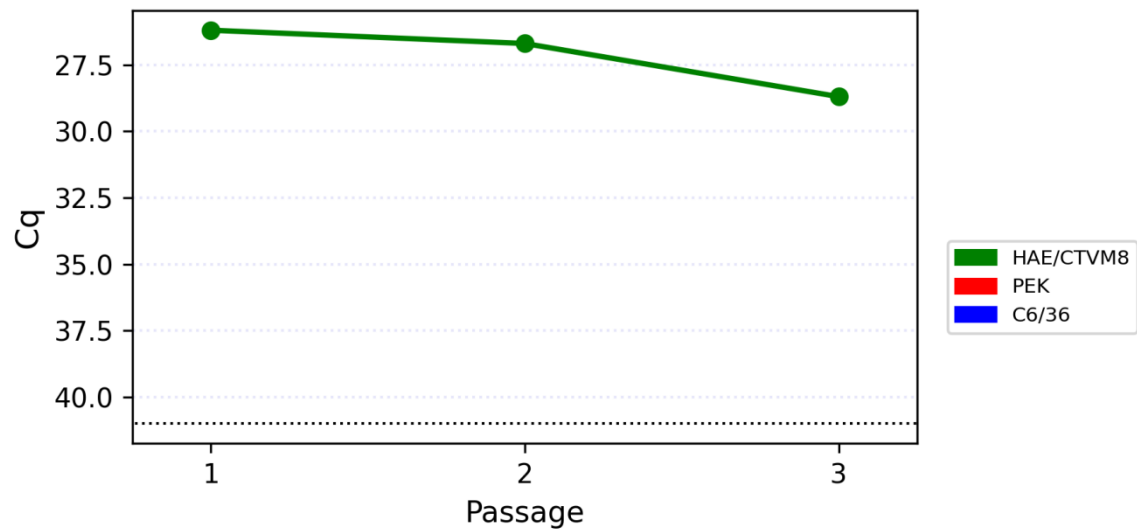

Figure S13. Dynamic of the real-time quantification cycle (Cq) during passages of the Komarovka hybomitra solemo-like virus. Black dotted line represents qPCR detection limit (41 cycles).

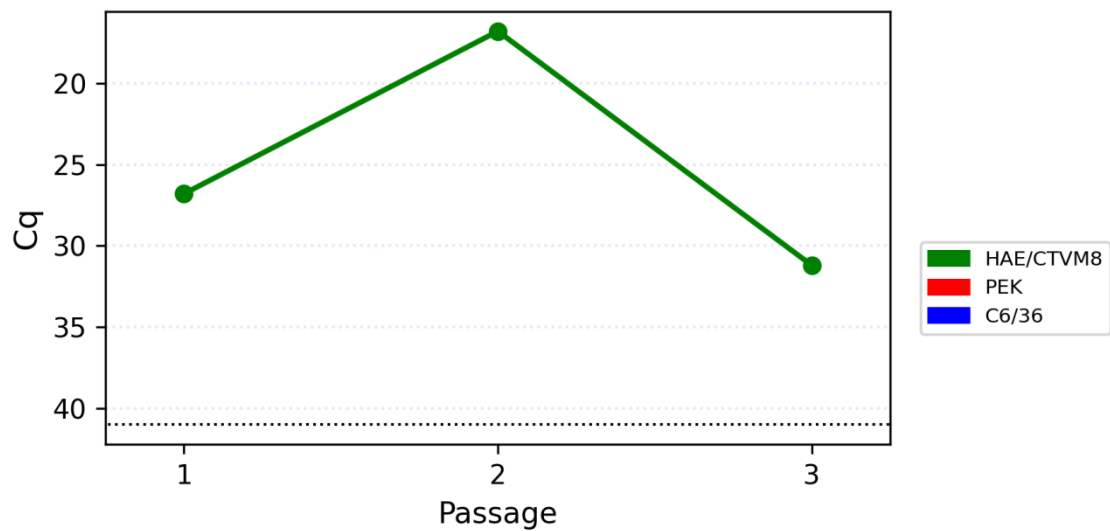

Figure S14. Dynamic of the real-time quantification cycle (Cq) during passages of the Barsukovka Hybomitra ifla-like virus. Black dotted line represents qPCR detection limit (41 cycles).
